# Supplementary material
Source: PubMed Central journal article supplement (PMC9980504)
Supplement: Supplementary_Digital_Material1.pdf [file Supplementary_Digital_Material1.pdf]

SUPPLEMENTARY DIGITAL MATERIAL 1

Supplementary Table I.—Characteristics of included studies (N.=45).

| First author and year                    | Country   | N.  | Participant diagnosis                                                               | Stage of cancer treatment                                                              | Mean age (years) | Intervention and intensity                                                                                  | Control group    | Cognition primary or secondary outcome/timing of follow-up assessment | Cognitive outcome measure                                                  |                                                                                                                        |
|------------------------------------------|-----------|-----|-------------------------------------------------------------------------------------|----------------------------------------------------------------------------------------|------------------|-------------------------------------------------------------------------------------------------------------|------------------|-----------------------------------------------------------------------|----------------------------------------------------------------------------|------------------------------------------------------------------------------------------------------------------------|
|                                          |           |     |                                                                                     |                                                                                        |                  |                                                                                                             |                  |                                                                       | Self-rated                                                                 | Performance-based                                                                                                      |
| Cognitive training interventions (N.=15) |           |     |                                                                                     |                                                                                        |                  |                                                                                                             |                  |                                                                       |                                                                            |                                                                                                                        |
| Bellens 2020 <sup>44</sup> ★             | Belgium   | 46  | Breast cancer survivors                                                             | Stages 0-III and N.=3 with metastatic disease                                          | 51.8             | AquaSnap (Cambridge , MyCQ™) a cognitive training videogame for 3 months, 3 x week for 60 min each session. | Usual care       | Primary/Follow up at 3 months and 6 months.                           | Beck Cognitive Insight Scale (BCIS), Cognitive Failure Questionnaire (CFQ) | My CQ: Trail making tests, Simple, Choice, Go No Go reaction time, Visual and Verbal Memory Recognition, N-back Coding |
| Bray 2017 <sup>45</sup> ★                | Australia | 242 | Adult cancer survivors with a primary malignancy (excluding central nervous system) | Completed three or more cycles of adjuvant chemotherapy in the previous 6 to 60 months | 53               | 15-week, home-based web-based cognitive training - Insight                                                  | Usual care       | Primary/ Follow up 6 months after intervention                        | FACT-Cog                                                                   | Cogstate online test battery                                                                                           |
| Cherrier 2013 <sup>46</sup> ★            | USA       | 28  | Cancer survivors                                                                    | Primary treatment (varied) completed                                                   | 58.9             | 7-week group                                                                                                | Waitlist control | Primary/ Follow up 1-2 weeks after intervention                       | FACT-Cog                                                                   | Rey Auditory Verbal                                                                                                    |

|                                 |         |     |                                                                               |                               |             |                                                                                                |                                 |                                                                                                    |                                        |                                                                                                                                     |                                                                                                               |
|---------------------------------|---------|-----|-------------------------------------------------------------------------------|-------------------------------|-------------|------------------------------------------------------------------------------------------------|---------------------------------|----------------------------------------------------------------------------------------------------|----------------------------------------|-------------------------------------------------------------------------------------------------------------------------------------|---------------------------------------------------------------------------------------------------------------|
|                                 |         |     | (various cancer types)                                                        | at least 6 months prior       |             | cognitive rehabilitation                                                                       |                                 |                                                                                                    |                                        |                                                                                                                                     | Learning Test (RAVLT), stroop test, digit symbol and span tests, Wechsler Adult Intelligence Scale (WAIS-III) |
| Damholdt 2016 <sup>47</sup> ★   | Denmark | 157 | Female breast cancer patients                                                 | Varied                        | 54.8        | 30 training sessions over 6 weeks with telephone support for web-based cognitive training      | Waitlist control                | Primary/ Follow up 5 months after intervention                                                     | Cognitive Failures Questionnaire (CFQ) | Paced Auditory Serial Addition Test (PASAT), RAVLT.                                                                                 |                                                                                                               |
| Dos Santos 2020 <sup>27</sup> ★ | France  | 167 | Breast, digestive system, hematologic/urologic/gynecologic and other cancers. | During or after chemotherapy. | 51 (median) | Computer-assisted Cognitive program (psychologist), or home cognitive self exercises = 9x3mths | Usual care and phone follow-up. | Primary/ Follow up 1 month (T1) and 2 months (T2) (self-report) and 3 months for performance tests | FACT-Cog                               | Grober and Buschke test for anterograde episodic memory, D2 test for attention and concentration, verbal fluency test, Trail Making |                                                                                                               |

|                                        |           |    |                                                       |                                                                |      |                                                                |                  |                                                             |                                                               |                                                                                                                                                                                                    |
|----------------------------------------|-----------|----|-------------------------------------------------------|----------------------------------------------------------------|------|----------------------------------------------------------------|------------------|-------------------------------------------------------------|---------------------------------------------------------------|----------------------------------------------------------------------------------------------------------------------------------------------------------------------------------------------------|
|                                        |           |    |                                                       |                                                                |      |                                                                |                  |                                                             |                                                               | Tests, WAIS IV.                                                                                                                                                                                    |
| Ercoli 2015 <sup>48</sup><br>★         | USA       | 48 | Female breast cancer survivors stage 0-III, 21-75 yrs | Primary treatment (varied) completed 18 months - 5 years prior | 53.8 | 5-week (2 hrs per week) group cognitive rehabilitation         | Waitlist control | Primary/<br>Follow up 2 months after intervention           | Patients Assessment of Own Functioning (PAOFI)                | Brief Visual Memory Test-Revised, RAVLT, PASAT, Trail Making Tests                                                                                                                                 |
| Kesler 2013 <sup>49</sup><br>★         | USA       | 41 | Female breast cancer survivors over 40 years          | Chemotherapy completed at least 18 months prior                | 55.5 | 48 sessions over 12 weeks, cognitive training program (online) | Waitlist control | Primary/ Follow up at 12 weeks when intervention completed. | n/a                                                           | Wisconsin card sorting test (WCST), Delis-Kaplan Executive Function System (D-KEFS), Hopkins Verbal Learning Test Revised (HVLTR), WAIS, Behavioral Rating Inventory of Executive Function (BRIEF) |
| King and Green 2015 <sup>50</sup><br>★ | Australia | 29 | Adult-onset cancer (not CNS)                          | Completed major treatments at least 6 months prior.            | 50.4 | 4 weekly 2 hr sessions of (ReCog) cognitive                    | Waitlist control | Primary/ Follow up 3 months after intervention.             | FACT Cog Brief Assessment of Prospective Memory EORTC-QLQ-C30 | Repeatable Battery for the Assessment                                                                                                                                                              |

|                                |           |    |                                                            |                                                     |      |                                                                             |                                    |                                                 |                                                                                        |                                                                                              |
|--------------------------------|-----------|----|------------------------------------------------------------|-----------------------------------------------------|------|-----------------------------------------------------------------------------|------------------------------------|-------------------------------------------------|----------------------------------------------------------------------------------------|----------------------------------------------------------------------------------------------|
|                                |           |    |                                                            |                                                     |      | rehabilitation program                                                      |                                    |                                                 | (Cognitive function)                                                                   | of Neuropsychological Status (RBANS) Trail making test                                       |
| McDougall 2011 <sup>35</sup> ★ | USA       | 22 | Community-based adult cancer survivors aged 65+            | Post treatment                                      | 73.9 | Cognitive Behavioral Model of Everyday Memory (CBMEM) training (8 sessions) | Health training group (8 sessions) | Primary/ Follow up 2 years after intervention   | Metamemory in Adulthood Questionnaire (MIA). Memory Self-Efficacy Questionnaire (MSEQ) | HVLT-R, Brief Visuospatial Memory Test—Revised, Rivermead Everyday Behavioural Memory Test.  |
| Meneses 2018 <sup>51</sup> ★   | USA       | 60 | Middle-aged and older breast cancer survivors              | Six months post primary cancer treatment            | 54.6 | Speed of processing training (10 hours within 6-8 weeks)                    | No contact. Usual care             | Primary/ Follow up 6 months after intervention. | n/a                                                                                    | Useful field of view (UFOV®) test. NIH Toolbox Cognition Battery (NIHTB-CB)                  |
| Mihuta 2018 <sup>52</sup> ★    | Australia | 76 | Adult-onset cancer excluding central nervous system cancer | Completed primary treatment at least 6 months prior | 55   | 4 week web-based cognitive rehabilitation therapy program (eReCog)          | Waitlist control                   | Primary/Follow up 3 months after intervention.  | FACT-Cog Brief Assessment of Prospective Memory                                        | Online test battery WebNeuro: Digit and Spatial Span (Wechsler Memory Scale WMS), California |

|                                  |             |    |                                                           |                                 |      |                                                                                                          |                   |                                                 |          |                                                                                                                               |
|----------------------------------|-------------|----|-----------------------------------------------------------|---------------------------------|------|----------------------------------------------------------------------------------------------------------|-------------------|-------------------------------------------------|----------|-------------------------------------------------------------------------------------------------------------------------------|
|                                  |             |    | Aged 18+ years                                            |                                 |      |                                                                                                          |                   |                                                 |          | Verbal Learning Test (CVLT), Trail Making, Stroop, Finger Tapping, and Rey Complex Figure Test.                               |
| Park 2017 <sup>53</sup><br>★     | South Korea | 54 | Breast cancer stage I-III aged 20-60                      | Receiving chemotherapy          | 44.4 | Promoting Cognitive Health Program (PCHP) 12 weeks face to face and 6 telephone health coaching sessions | Usual care        | Primary/ Follow up 6 months after intervention. | FACT Cog | Digit span, K-COWAT Korean Controlled Oral Word Association Test; K-WAIS, SVLT Seoul Verbal Learning Test, Trail Making Tests |
| Peterson 2018 <sup>30</sup><br>★ | USA         | 12 | Breast, prostate Ovarian, lymphoma, lung multiple myeloma | Undergoing treatment for cancer | 57.9 | NeuroActive® cognitive training software. Three sessions per week for 12 weeks.                          | Flexibility group | Primary/Follow up at 12 weeks.                  |          | WMS (IV), General Cognitive Screener (BCOG), Trail Making Tests, WAIS-IV, Logical Memory I and II (LMI, LMII), COWAT,         |

|                                                   |     |    |                                                       |                                                                          |      |                                                                                                                                  |                  |                                                |                                                         |                                                                                |
|---------------------------------------------------|-----|----|-------------------------------------------------------|--------------------------------------------------------------------------|------|----------------------------------------------------------------------------------------------------------------------------------|------------------|------------------------------------------------|---------------------------------------------------------|--------------------------------------------------------------------------------|
|                                                   |     |    |                                                       |                                                                          |      |                                                                                                                                  |                  |                                                |                                                         | Block Design (BD)                                                              |
| Von Ah 2012 <sup>29</sup><br>★                    | USA | 88 | Post-menopausal breast cancer survivors over 40 years | Chemotherapy completed at least 12 months prior (currently disease free) | 55.2 | Advanced cognitive training: Memory training (N.=29) and speed of processing training (N.=30). 10 x 1-hr sessions over 6–8 weeks | Waitlist control | Primary/Follow up 2 months after intervention. | FACT-Cog, Squire Subjective Memory Questionnaire (SSMQ) | RAVLT, Rivermead Everyday Behavioural Memory Test, Useful Field of View (UFOV) |
| Wu 2018 <sup>54</sup><br>★                        | USA | 60 | Prostate cancer on androgen deprivation therapy (ADT) | Up to three months of ADT                                                | 66.6 | BrainHQ online cognitive rehabilitation 1 h/day, 5 days/week for 8 weeks                                                         | Usual care       | Primary/Follow up 8 weeks after intervention.  | Patient Assessment of Own Functioning Inventory (PAOFI) | Online CNS Vital Signs test battery                                            |
| Cognitive behavioral therapy interventions (N.=4) |     |    |                                                       |                                                                          |      |                                                                                                                                  |                  |                                                |                                                         |                                                                                |
| Ferguson 2012 <sup>55</sup>                       | USA | 40 | Female breast cancer survivors stage I-II             | At least 18 months post-treatment (currently disease free)               | 50.3 | Memory and Attention Adaption Training (MAAT). 4 x biweekly individual sessions.                                                 | Waitlist control | Primary/Follow up 2 months after baseline      | Multiple Ability Self-Report Questionnaire (MASQ)       | CVLT-II, D-KEFS                                                                |

|                                         |                 |     |                                                                      |                                                                         |                  |                                                                                  |                            |                                                                          |                                    |                                                            |
|-----------------------------------------|-----------------|-----|----------------------------------------------------------------------|-------------------------------------------------------------------------|------------------|----------------------------------------------------------------------------------|----------------------------|--------------------------------------------------------------------------|------------------------------------|------------------------------------------------------------|
| Ferguson 2016 <sup>31</sup><br>★        | USA             | 47  | Breast cancer survivors stage I, II, or IIIA                         | Chemotherapy completed at least 6 months prior (currently disease free) | 54.6             | Videoconference-delivered CBT of 8 x weekly sessions.                            | Supportive therapy         | Primary/ Follow up- 2 months after intervention                          | FACT-Cog                           | CVLT SDMT                                                  |
| Goedendorp 2014 <sup>56</sup><br>★      | The Netherlands | 112 | Cancer survivors (various cancer types)                              | Primary treatment (varied) completed at least 12 months prior           | 45               | Cognitive behavioural therapy (CBT) 5 – 26 individual sessions.                  | Waitlist control           | Primary/ Follow up 6 months after baseline                               | Alertness Behaviour subscale       | SDMT, reaction time task                                   |
| May 2009 <sup>34</sup>                  | The Netherlands | 147 | Cancer survivors (various cancer types)                              | Primary treatment (varied) completed at least 3 months prior            | 48.8             | Physical training with CBT – 12 weeks x 2 hr sessions.                           | Physical training (no CBT) | Secondary/ Follow up at 9 months                                         | EORTC QLQ-C30 (Cognitive function) | n/a                                                        |
| First author and year                   | Country         | N.  | Participant diagnosis                                                | Stage of cancer treatment                                               | Mean age (years) | Intervention                                                                     | Control group              | Cognition primary or secondary outcome/timing of assessment              | Cognitive outcome measure          |                                                            |
|                                         |                 |     |                                                                      |                                                                         |                  |                                                                                  |                            |                                                                          | Self-rated                         | Performance-based                                          |
| Physical activity interventions (N.=16) |                 |     |                                                                      |                                                                         |                  |                                                                                  |                            |                                                                          |                                    |                                                            |
| Campbell 2018 <sup>58</sup><br>★        | Canada          | 19  | Breast cancer aged 40 to 65 years, post-menopausal, stages I to IIIA | Following chemotherapy treatment                                        | 52.4             | 24-week aerobic exercise: 150 min/wk aerobic exercise with two 45mins supervised | Usual care                 | Primary/Follow up 24 weeks after baseline on completion of intervention. | FACT-Cog                           | HVLT-R, Trail making Tests, COWAT, Stroop test (with fMRI) |

|                            |        |     |                                             |                                                               |      |                                                                                                            |                  |                                                                        |                                                         |                                                                                                           |  |
|----------------------------|--------|-----|---------------------------------------------|---------------------------------------------------------------|------|------------------------------------------------------------------------------------------------------------|------------------|------------------------------------------------------------------------|---------------------------------------------------------|-----------------------------------------------------------------------------------------------------------|--|
|                            |        |     |                                             |                                                               |      | sessions per week.<br>x 2 30-min unsupervised home sessions.                                               |                  |                                                                        |                                                         |                                                                                                           |  |
| Carayol 2019 <sup>59</sup> | France | 143 | Early breast cancer                         | During chemotherapy and radiotherapy following surgery        | 51.6 | 3 weekly moderate-intensity mixed aerobic and resistance exercise + 9 dietetic consultations for 26 weeks. | Usual care       | Primary/Follow up 12 months after intervention.                        | EORTC QLQ-C30 (Cognitive function)                      | Test of Attentional Performance                                                                           |  |
| Derry 2015 <sup>60</sup> ★ | USA    | 200 | Female stage 0-III breast cancer survivors  | Primary treatment (varied) completed 2 months - 3 years prior | 51.6 | Yoga intervention 12 weeks 2 x week.                                                                       | Waitlist control | Primary/ Follow up 3 months after intervention                         | Breast Cancer Prevention Trial (BCPT) Symptom Checklist | n/a                                                                                                       |  |
| Gokal 2018 <sup>62</sup>   | UK     | 50  | Breast cancer stage I-III aged 18-75 years. | Waiting to begin adjuvant or neo-adjuvant chemotherapy        | 52.1 | 12 weeks of home-based, self-managed, moderate intensity walking of 30 mins x 5 times a week.              | Usual care       | Primary/ Follow up after the completion of six cycles of chemotherapy. | Cognitive Failures Questionnaire (CFQ)                  | Stroop test, forwards/back digit span and WAIS Block Design, Sustained Attention to Response Task (SART). |  |



|                                 |       |     |                                                  |                                                                            |      |                                                                                                                    |                                                          |                                                 |                                                                   |                                                                   |
|---------------------------------|-------|-----|--------------------------------------------------|----------------------------------------------------------------------------|------|--------------------------------------------------------------------------------------------------------------------|----------------------------------------------------------|-------------------------------------------------|-------------------------------------------------------------------|-------------------------------------------------------------------|
| Hartman 2018 <sup>63</sup><br>★ | USA   | 87  | Breast cancer                                    | Mean 2.5 years post-surgery                                                | 57   | 12-week physical activity individual goals aiming for 150 mins of moderate or vigorous physical activity per week. | Usual care                                               | Primary/ Follow up 12 weeks after intervention. | Patient-Reported Outcomes Measurement Information System (PROMIS) | NIH Cognitive Toolbox                                             |
| Larkey 2016 <sup>33</sup><br>★  | USA   | 101 | Breast cancer survivors stage 0-III, 40-75 years | Primary treatment (varied) completed 6 months - 5 years prior              | 59   | Qigong/Tha i Chi Easy- 12 weekly sessions.                                                                         | Sham Qigong                                              | Primary/ Follow up 12 weeks after intervention  | FACT-Cog                                                          | WAIS-III (digit span and letter-number sequencing)                |
| Miki 2014 <sup>66</sup>         | Japan | 78  | Breast or prostate cancer patients over 65 years | Varied                                                                     | 74.2 | Speed-feedback therapy with bicycle ergometer 1 x week for 4 weeks.                                                | Usual care                                               | Primary/ Follow up 4 weeks after intervention.  | n/a                                                               | Frontal Assessment Battery (FAB)                                  |
| Myers 2019 <sup>36</sup><br>★   | USA   | 50  | Breast cancer stage I-III                        | 2 months to 8 years post completion of chemotherapy and radiation therapy. | 53.7 | Qigong – 8 weekly 60-min Sessions + 15 min at home twice a day.                                                    | Gentle exercise (N.=20) and survivorship support (N.=11) | Primary/Follow up 4 weeks after intervention.   | FACT-Cog                                                          | RAVLT 1-5 total, F-A-S test of verbal fluency, Trail making test. |

|                                  |           |    |                                                      |                                    |      |                                                                                                                                     |                   |                                                  |                                             |                                                                                                   |
|----------------------------------|-----------|----|------------------------------------------------------|------------------------------------|------|-------------------------------------------------------------------------------------------------------------------------------------|-------------------|--------------------------------------------------|---------------------------------------------|---------------------------------------------------------------------------------------------------|
| Northey 2019 <sup>68</sup><br>★  | Australia | 17 | Breast cancer survivors stages I-III                 | Less than 24 months post diagnosis | 62.9 | High-intensity interval training (n = 6); moderate-intensity continuous training (n = 5); on cycle ergometer 3 x week for 12 weeks. | Waitlist control  | Primary/ Follow up 12 weeks after intervention.  | n/a                                         | Cogstate online test battery                                                                      |
| Oh 2012 <sup>69</sup><br>★       | Australia | 81 | Medical oncology patients of various cancer-types    | Varied stages of chemotherapy      | 62   | Medical Qigong – group 10-week program of 2 x 90 mins per week.                                                                     | Usual care        | Primary/ Follow up 10 weeks after intervention.  | EORTCQoL C30 (Cognitive function), FACT-Cog | n/a                                                                                               |
| Pasyar 2019 <sup>70</sup>        | Iran      | 40 | Breast cancer with lymphoedema                       | One year post surgery              | 51.7 | Yoga - 8 weeks x 2 per week group setting and x 1 week home practice.                                                               | Usual care        | Secondary/ Follow up 8 weeks after intervention. | EORTCQoL C30 (Cognitive function)           | n/a                                                                                               |
| Peterson 2018 <sup>30</sup><br>★ | USA       | 12 | Breast, throat/tongue, anaplastic oligodendroglioma, | Undergoing treatment for cancer    | 57.9 | Motion Fitness Brain Bike® recumbent                                                                                                | Flexibility group | Primary/Follow up at 12 weeks.                   |                                             | WMS (IV), General Cognitive Screener (BCOG), Trail Making Tests, WAIS-IV, Logical Memory I and II |

|                                |         |     |                                    |                                                         |      |                                                                                                                                                      |                          |                                                   |                                                                              |                                       |
|--------------------------------|---------|-----|------------------------------------|---------------------------------------------------------|------|------------------------------------------------------------------------------------------------------------------------------------------------------|--------------------------|---------------------------------------------------|------------------------------------------------------------------------------|---------------------------------------|
|                                |         |     | colon cancers                      |                                                         |      | cycle ergometer. Three sessions per week for 12 weeks.                                                                                               |                          |                                                   |                                                                              | (LMI, LMII), COWAT, Block Design (BD) |
| Rogers 2009 <sup>73</sup><br>★ | USA     | 41  | Breast cancer stage I, II, or IIIA | On estrogen receptor modulators or aromatase inhibitors | 53   | 12-wk physical activity behavior change intervention : 6 weekly discussion groups, 12 individual supervised exercise sessions + home based exercise. | Usual care               | Secondary/ Follow up 3 months after intervention. | FACT-Cog<br>Self-rated mental acuity, concentration, memory, verbal fluency. | n/a                                   |
| Schmidt 2014 <sup>37</sup>     | Germany | 101 | Breast cancer                      | Starting chemotherapy                                   | 52.7 | Supervised, group-based, resistance exercise 2 x week over 12 weeks                                                                                  | 12 week relaxation group | Primary/Follow up 1 week after intervention.      | EORTCQoL C30 (cognitive function)                                            | Trail making tests                    |
| Steindorf 2014 <sup>38</sup>   | Germany | 160 | Breast cancer stage 0–III          | Undergoing chemotherapy                                 | 55.8 | Group-based 12-week progressive                                                                                                                      | 12 week relaxation group | Primary/Follow up 1 week after intervention.      | Fatigue Assessment Questionnaire (cognitive fatigue)                         | Trail making tests                    |

|                                          |        |     |                                                           |                                                 |      |                                                                                                       |                    |                                                  |                                   |                                                            |
|------------------------------------------|--------|-----|-----------------------------------------------------------|-------------------------------------------------|------|-------------------------------------------------------------------------------------------------------|--------------------|--------------------------------------------------|-----------------------------------|------------------------------------------------------------|
|                                          |        |     |                                                           |                                                 |      | resistance training x 2 week                                                                          |                    |                                                  | EORTCQoL C30 (Cognitive)          |                                                            |
| Vadiraja 2009 <sup>39</sup>              | India  | 88  | Breast cancer patients stage II and III (newly diagnosed) | Currently undergoing radiotherapy               | 47.6 | Integrated yoga program – x 6 weeks daily sessions of 60 min three supervised.                        | Supportive therapy | Secondary/ Follow up 6 weeks after radiotherapy  | EORTCQoL C30 (Cognitive function) | n/a                                                        |
| Supportive therapy interventions (N.=10) |        |     |                                                           |                                                 |      |                                                                                                       |                    |                                                  |                                   |                                                            |
| Bjorneklett 2013 <sup>57</sup> ★         | Sweden | 382 | Breast cancer patients (newly diagnosed)                  | Varied                                          | 57.8 | Support group intervention- one week residential + 4 days of follow-up after 2 months.                | Usual care         | Secondary/ Follow up 2 months after intervention | EORTCQoL C30 (Cognitive function) | n/a                                                        |
| Ding 2020 <sup>61</sup>                  | China  | 74  | Breast cancer, stage I-III.                               | Completion of at least 6 cycles of chemotherapy | 50.8 | CALM: a brief, manualised, individual psychotherapy program. 3 to 6 sessions each lasting 30 minutes. | Usual care         | Primary/ Follow up after intervention completed. | FACT-Cog                          | Prospective and Retrospective Memory Questionnaire (PRMQ). |
| Freeman 2015 <sup>28</sup>               | USA    | 118 | Breast cancer survivors                                   | Primary treatment                               | 55.4 | Imagery-based                                                                                         | Waitlist control   | Secondary/ Follow up 3 months after intervention | FACT-Cog                          | n/a                                                        |

|                                |     |     |                                                                   |                                                                                                                                                   |      |                                                                                                                                                          |                                                                                     |                                                              |                                     |                                  |
|--------------------------------|-----|-----|-------------------------------------------------------------------|---------------------------------------------------------------------------------------------------------------------------------------------------|------|----------------------------------------------------------------------------------------------------------------------------------------------------------|-------------------------------------------------------------------------------------|--------------------------------------------------------------|-------------------------------------|----------------------------------|
| ★                              |     |     |                                                                   | (varied)<br>completed<br>at least 6<br>weeks<br>prior                                                                                             |      | behavioural<br>intervention<br>5 x week for<br>4-hrs or<br>telemedicine<br>delivery                                                                      |                                                                                     |                                                              |                                     |                                  |
| Hartman<br>2019 <sup>64</sup>  | USA | 333 | Overweight and obese<br>postmenopausal breast<br>cancer survivors | Stage IA-<br>IIC breast<br>cancer<br>within 10<br>years of<br>enrollment<br>,<br>completed<br>planned<br>surgery,<br>and<br>active<br>treatments. |      | Telephone-<br>based weight<br>loss<br>intervention<br>delivered by<br>trained<br>lifestyle<br>coaches<br>through 12<br>phone calls<br>over 6-<br>months. | Usual<br>care +<br>US<br>Dietary<br>Guideli<br>nes for<br>Americ<br>ans,<br>(2010). | Primary? Follow up 6 months after intervention.              | n/a                                 | Online NeuroTrax<br>test battery |
| Johns 2016 <sup>32</sup><br>★  | USA | 71  | Breast and colorectal<br>cancer survivors stage<br>0-III          | Chemother<br>apy and/or<br>radiothera<br>py<br>completed<br>3 months -<br>5 years<br>prior                                                        | 56.7 | Mindfulness<br>-based stress<br>reduction 8 x<br>weekly 2-hr<br>classes                                                                                  | Educati<br>on and<br>support                                                        | Primary/ Follow up 6 months after intervention               | Attentional Function<br>Index (AFI) | Stroop test                      |
| Johnston<br>2011 <sup>65</sup> | USA | 13  | Female breast cancer<br>survivors                                 | Primary<br>treatment<br>completed<br>(currently<br>disease-<br>free)                                                                              | 54   | Patient<br>education<br>integrated<br>with<br>acupuncture<br>- 4 x week<br>education +                                                                   | Usual<br>care                                                                       | Secondary/ Follow up at 10 weeks when intervention completed | FACT-Cog                            | n/a                              |

|                              |         |     |                                                                                   |                                         |      |                                                                               |                                                  |                                                   |                                   |                                                  |
|------------------------------|---------|-----|-----------------------------------------------------------------------------------|-----------------------------------------|------|-------------------------------------------------------------------------------|--------------------------------------------------|---------------------------------------------------|-----------------------------------|--------------------------------------------------|
|                              |         |     |                                                                                   |                                         |      | 8 x 50-minute acupuncture weekly.                                             |                                                  |                                                   |                                   |                                                  |
| Milbury 2013 <sup>67</sup> ★ | USA     | 47  | Female breast cancer survivors stage I-III                                        | Chemotherapy received 6-60 months prior | 53   | Tibetan sound meditation – 2 x week for 6 weeks.                              | Usual care                                       | Primary/ Follow up one month after intervention   | FACT-Cog                          | Digit span test, SDMT, COWAT, RAVLT.             |
| Rahmani 2014 <sup>71</sup> ★ | Iran    | 36  | Breast cancer stages I-III                                                        | More than one month post diagnosis      | 44   | Mindfulness based stress reduction (N.=12) Metacognition (N.=12) x 8 sessions | Usual care                                       | Secondary/ Follow up 2 months after intervention. | EORTCQoL C30 (Cognitive function) | n/a                                              |
| Reich 2017 <sup>72</sup>     | USA     | 322 | Breast cancer Stages 0-III                                                        | Post treatment                          | 56.6 | Mindfulness based stress reduction – 6 weeks and 2 hrs per week               | Usual care – not undertaking yoga or meditation. | Primary/Follow up 12 weeks after intervention.    | Everyday Cognition (ECog) scale   | n/a                                              |
| Rottmann 2015 <sup>74</sup>  | Denmark | 507 | Breast, prostate, colon, or rectal cancer patients diagnosed within 2 years prior | Primary treatment (varied) completed    | 61   | Residential x 6 days psychosocial rehabilitation course                       | Usual care                                       | Secondary/ Follow up 6 months after intervention. | EORTCQoL C30 (Cognitive function) | n/a                                              |
| Tong 2018 <sup>75</sup> ★    | China   | 80  | Breast cancer                                                                     | Post treatment                          | 42   | Two 4-week courses of acupuncture with a 3-day rest. Every                    | Usual care                                       | Primary/ Follow up when intervention completed    | FACT-Cog,                         | AVLT, Verbal fluency test, symbol digit modality |

|  |  |  |  |  |                                                                |  |  |  |                                        |
|--|--|--|--|--|----------------------------------------------------------------|--|--|--|----------------------------------------|
|  |  |  |  |  | week,<br>patients were<br>treated once<br>a day for 5<br>days. |  |  |  | test, clock<br>drawing test,<br>TMT-B. |
|--|--|--|--|--|----------------------------------------------------------------|--|--|--|----------------------------------------|

★ Studies reporting a significant difference between intervention and control groups ( $P \leq 0.05$ ).

## References

1. Myers J. Chemotherapy-related cognitive impairment: The breast cancer experience. *Oncol Nurs Forum* 2012; 39(1):31-40.
2. Janelsins M, Kesler S, Ahles T, Morrow G. Prevalence, mechanisms, and management of cancer-related cognitive impairment. *Int Rev Psychiatry* 2014; 26(1): 102–113.
3. Kanaskie M. Chemotherapy-related cognitive change: A principle-based concept analysis. *Oncol Nurs Forum* 2012; 39(3): 241-248.
4. Pergolotti M, Williams G, Campbell C, Munoz L, Muss H. Occupational therapy for adults with cancer: Why it matters. *Oncologist* 2016; 21: 314-9.
5. Nott M, Barden H, Chapparo C, Ranka J. Evidence based practice and knowledge translation: A survey of Australian occupational therapy practice with clients experiencing neurocognitive impairments. *Aust Occup Ther J* 2020; 67: 74-82.
6. Wallis A, Meredith P, Stanley M. Cancer care and occupational therapy: A scoping review. *Aust Occup Ther J* 2020; 67: 172–194.
7. Faithfull S, Samuel C, Lemanska A, Warnock C, Greenfield D. Self-reported competence in long term care provision for adult cancer survivors: A cross sectional survey of nursing and allied health care professionals. *Int J Nurs Stud* 2016; 53: 85-94.
8. Mulcahy S, Prendergast J, Foley G, Hare A, Murphy E, Guinan E *et al.* Exercise rehabilitation services provided by physiotherapy departments in cancer care in Ireland. *Ir Med J* 2018; 111(9): 817-818.
9. Ranka J, Chapparo C. Definition of terms. In J. Ranka, C Chapparo. *Occupational Performance Model (Australia): Monograph 1.* Sydney: Occupational Performance Network; 1997. p.58–60.
10. Boykoff N, Moieni M, Subramanian S. Confronting chemobrain: An in-depth look at survivors’ reports of impact on work, social networks, and health care response. *J Cancer Surviv* 2009; 3(4): 223-232.
11. Calvio L, Peugeot M, Bruns G, Todd B, Feuerstein M. Measures of cognitive function and work in occupationally active breast cancer survivors. *J Occup Environ Med* 2010; 52(2): 219-227.
12. Selamat M, Loh S, Mackenzie L, Vardy J. Chemobrain experienced by breast cancer survivors: A meta-ethnography study investigating research and care implications. *PLoS One* 2014;9(9):108002.
13. Simons D, Boot W, Charness N, Gathercole S, Chabris C, Hambrick D, *et al.* Do “brain-training” programs work? *Psychol Sci Public Interest* 2016;17:103–186.
14. Sala G, Gobet F. Cognitive training does not enhance general cognition. *Trends Cogn Sci* 2019;23:9-20.
15. Lange M, Joly F, Vardy J, Ahles T, Dubois M, Tron L *et al.* Cancer-related cognitive impairment: an update on state of the art, detection, and management strategies in cancer survivors. *Ann Oncol* 2019; 30: 1925–1940.
16. Treanor CJ, McMenamin UC, O'Neill RF, Cardwell CR, Clarke MJ, Cantwell M, Donnelly M. Non-pharmacological interventions for cognitive impairment due to systemic cancer treatment. *Cochrane Database Syst Rev.* 2016;(8):CD011325.
17. Zeng Y, Dong J, Huang M, Zhang J, Zhang X, Xie M *et al.* Nonpharmacological interventions for cancer-related cognitive impairment in adult cancer patients: A network meta-analysis. *Int J Nurs Stud* 2020;104:103514.
18. Ehlers D, Aquinaga S, Cosman J, Severson J, Kramer A, McAuley E. The effects of physical activity and fatigue on cognitive performance in breast cancer survivors. *Breast Cancer Res Treat* 2017;165(3):699-707.
19. Myers J. Review complementary and integrative interventions for cancer-related cognitive changes. *Asia Pac J Oncol Nurs* 2015;2:215-26.
20. Barton D, Burger K, Novotany P, Fitch T, Kohli S, Soori G, *et al.* The use of Ginkgo biloba for the prevention of chemotherapy-related cognitive dysfunction in women receiving adjuvant treatment for breast cancer. *Support Care Cancer* 2013; 21(4): 1185-92.
21. Von Ah D, Jansen C, Allen D. Evidence-based interventions for cancer and treatment-related cognitive impairment. *Clin J Oncol Nurs* 2014; 18(6): 17-25.
22. Nathan P, Sunita K, Dilley K. Guidelines for identification of, advocacy for, and intervention in neurocognitive problems in survivors of childhood cancer. *Arch Pediatr Adolesc Med* 2007; 161(8): 798-806.
23. Taphoom M, Klein M. Cognitive deficits in adult patients with brain tumours. *Lancet Neurol* 2004; 3(3): 159-68.
24. Higgins J, Green S. *Cochrane Handbook for Systematic Reviews of Interventions Version 5.1.0.* London: The Cochrane Collaboration; 2011.
25. Checklist for randomized controlled trials. Joanna Briggs Institute; 2017 [Internet]. Available from: [https://joannabriggs.org/sites/default/files/2019-05/JBI\\_RCTs\\_Appraisal\\_tool2017\\_0.pdf](https://joannabriggs.org/sites/default/files/2019-05/JBI_RCTs_Appraisal_tool2017_0.pdf) [cited 2021, Sep 09].
26. Borenstein M, Hedges L, Higgins J, Rothstein H. *Introduction to meta-analysis.* Hoboken, NJ: Wiley-Blackwell; 2009.
27. Dos Santos M, Hardy-Léger I, Rigal O, Licaj I, Dauchy S, Levy C, *et al.* Cognitive rehabilitation program to improve cognition of cancer patients treated with chemotherapy: A 3-arm randomized trial. *Cancer* 2020;



126: 5328-5336.

28. Freeman L, White R, Ratcliff C, Sutton S, Stewart M, Palmer J, *et al.* A randomized trial comparing live and telemedicine deliveries of an imagery-based behavioral intervention for breast cancer survivors: reducing symptoms and barriers to care. *Psycho-Oncology* 2015; 24(8): 910-8.
29. Von Ah D, Carpenter J, Saykin A, Monahan P, Wu J, Yu M, *et al.* Advanced cognitive training for breast cancer survivors: A randomized controlled trial. *Breast Cancer Res Treat* 2012; 135: 799–809.
30. Peterson B, Johnson C, Case K, Shackelford D, Brown J, Lalonde T, *et al.* Feasibility of a combined aerobic and cognitive training intervention on cognitive function in cancer survivors: A pilot investigation. *Pilot Feasibility Stud* 2018; 4:50.
31. Ferguson R, Sigmon S, Pritchard A, LaBrie S, Goetze R, Fink C, *et al.* A randomized trial of videoconference-delivered cognitive behavioral therapy for survivors of breast cancer with self-reported cognitive dysfunction. *Cancer* 2016; 122(11):1782-91.
32. Johns S, Von Ah D, Brown L, Beck-Coon K, Talib T, Alyea J, *et al.* Randomized controlled pilot trial of mindfulness-based stress reduction for breast and colorectal cancer survivors: effects on cancer-related cognitive impairment. *J Cancer Surviv* 2016; 10(3): 437-48.
33. Larke L, Roe D, Smith L, Millstine D. Exploratory outcome assessment of Qigong/Tai Chi Easy on breast cancer survivors. *Complement Ther Med* 2016; 29: 196-203.
34. May A, Korstjens I, van Weert E, van den Borne B, Hoekstra-Weebers J, van der Schans C, *et al.* Long-term effects on cancer survivors' quality of life of physical training *versus* physical training combined with cognitive-behavioral therapy: results from a randomized trial. *Support Care Cancer* 2009; 17(6): 653-63.
35. McDougall G, Becker H, Acee T, Vaughan P, Delville C. Symptom management of affective and cognitive disturbance with a group of cancer survivors. *Arch Psychiatr Nurs* 2011; 25(1): 24–35.
36. Myers J, Mitchell M, Krigel S, Steinhoff A, Boyce-White A, Van Goethem, K, *et al.* Qigong intervention for breast cancer survivors with complaints of decreased cognitive function. *Support Care Cancer* 2019; 27:1395–1403.
37. Schmidt M, Wiskemann J, Armbrust P, Schneeweiss A, Ulrich C, Steindorf, K. Effects of resistance exercise on fatigue and quality of life in breast cancer patients undergoing adjuvant chemotherapy: A randomized controlled trial. *Int J Cancer* 2015; 137: 471–480.
38. Steindorf K, Schmidt M, Klassen O, Ulrich C, Oelmann J, Habermann N, *et al.* Randomized, controlled trial of resistance training in breast cancer patients receiving adjuvant radiotherapy: Results on cancer-related fatigue and quality of life. *Ann Oncol* 2014; 25: 2237–2243.
39. Vadiraja H, Rao M, Negendra H, Rekha M, Vanitha N, Gopinath K *et al.* Effects of yoga program on quality of life and affect in early breast cancer patients undergoing adjuvant radiotherapy: A randomized controlled trial. *Complement Ther Med* 2009; 17(5): 274-80.
40. Functional assessment of cancer therapy-cognition FACT-Cog. FACIT; 2016 [Internet]. Available from: <https://www.facit.org/measures/FACT-Cog> [cited 2021, Sep 09].
41. European Organization for Research and Treatment of Cancer Quality of life questionnaire EORTC-QLQ-C30. EORTC; 1995 [Internet]. Available from: [https://www.eortc.org/research\\_field/quality-of-life/](https://www.eortc.org/research_field/quality-of-life/) [cited 2021, Sep 09].
42. WISC-IV Clinical Use and Interpretation. Wechsler Adult Intelligence Scale; 2008 [Internet]. Available from: <https://www.sciencedirect.com/topics/neuroscience/wechsler-adult-intelligence-scale> [cited 2021, Sep 09].
43. Controlled Oral Word Association Test. *Encyclopedia of Clinical Neuropsychology*; 2011 [Internet]. Available from: [https://link.springer.com/referenceworkentry/10.1007%2F978-0-387-79948-3\\_876](https://link.springer.com/referenceworkentry/10.1007%2F978-0-387-79948-3_876) [cited 2021, Sep 09].
44. Bellens A, Roelant E, Sabbe B, Peeters M, van Dam P. A video game based cognitive training for breast cancer survivors with cognitive impairment: A prospective randomized pilot trial. *The Breast* 2020; 53: 23-32.
45. Bray V, Dhillon H, Bell H, Kabourakis M, Fiero M, Yip D *et al.* Evaluation of a web-based cognitive rehabilitation program in cancer survivors reporting cognitive symptoms after chemotherapy. *J Clin Oncol* 2017; 35: 217-225.
46. Cherrier M, Anderson K, David D, Higano C, Gray H, Church A *et al.* A randomized trial of cognitive rehabilitation in cancer survivors. *Life Sci* 2013; 93(17): 617-22.
47. Damholdt M, Mehlsen M, O'Toole M, Andreasen R, Pedersen A, Zachariae R. Web-based cognitive training for breast cancer survivors with cognitive complaints—a randomized controlled trial. *Psycho-Oncology* 2016; 25:1293–1300.

48. Ercoli L, Petersen L, Hunter A, Castellon S, Kwan L, Kahn-Mills B *et al.* Cognitive rehabilitation group intervention for breast cancer survivors: results of a randomized clinical trial. *Psycho-Oncology* 2015; 24(11): 1360-7.
49. Kesler S, Hosseini H, Heckler C, Janelins M, Palesh O, Mustian K *et al.* Cognitive training for improving executive function in chemotherapy-treated breast cancer survivors. *Clin Breast Cancer* 2013; 13(4): 299-306.
50. King S, Green H. Psychological intervention for improving cognitive function in cancer survivors: A literature review and randomized controlled trial. *Front Oncol* 2015; 5: 72.
51. Meneses K, Benz R, Bail J, Vo J, Triebel K, Fazeli P *et al.* Speed of processing training in middle-aged and older breast cancer survivors (SOAR): Results of a randomized controlled pilot. *Breast Cancer Res Treat* 2018; 168: 259–267.
52. Mihuta M, Green H, Shum D. Web-based cognitive rehabilitation for survivors of adult cancer: A randomised controlled trial. *Psycho-Oncology* 2018; 27: 1172–1179.
53. Park J, Jung Y, Kim K, Bae S. Effects of compensatory cognitive training intervention for breast cancer patients undergoing chemotherapy: A pilot study. *Support Care in Cancer* 2017; 25: 1887–1896.
54. Wu L, Amidi A, Tanenbaum M, Winkel G, Gordon W, Hall S *et al.* Computerized cognitive training in prostate cancer patients on androgen deprivation therapy: A pilot study. *Support Care in Cancer* 2018; 26: 1917–1926.
55. Ferguson R, McDonald B, Rocque M, Furstenberg C, Horrigan S, Ahles T *et al.* Development of CBT for chemotherapy-related cognitive change: results of a waitlist control trial. *Psycho-Oncology* 2012; 21(2):176-86.
56. Goedendorp M, Knoop H, Gielissen M, Verhagen C, Bleijenberg G. The effects of cognitive behavioral therapy for post-cancer fatigue on perceived cognitive disabilities and neuropsychological test performance. *J Pain Symptom Manage* 2014; 47(1): 35-44.
57. Bjorneklett H, Rosenblad A, Lindernalm C, Ojutkangas M, Letocha H, Strang P *et al.* Long-term follow up of a randomized study of support group intervention in women with primary breast cancer. *J Psychosom Res* 2013; 74(4): 346-53.
58. Campbell K, Kam J, Neil-Sztramko S, Ambrose T, Handy T, Lim, H *et al.* Effect of aerobic exercise on cancer-associated cognitive impairment: A proof-of-concept RCT. *Psycho-Oncology* 2018; 27: 53–60.
59. Carayol M, Ninot G, Senesse P, Bleuse J, Gourgou S, Sancho-Garnier H *et al.* Short- and long-term impact of adapted physical activity and diet counseling during adjuvant breast cancer therapy: The “APAD1” randomized controlled trial. *BMC Cancer* 2019; 19:737.
60. Derry H, Jaremka L, Bennett J, Peng J, Andridge R, Shapiro C *et al.* Yoga and self-reported cognitive problems in breast cancer survivors: a randomized controlled trial. *Psycho-Oncology* 2015; 24(8): 958-66.
61. Ding K, Zhang X, Zhao J, Zuo H, Bi Z, Cheng H. Managing Cancer and Living Meaningfully (CALM) intervention on chemotherapy-related cognitive impairment in breast cancer survivors. *Integr Cancer Ther* 2020; 19: 1–10.
62. Gokal K, Munir F, Ahmed S, Kancherla K, Wallis D. Does walking protect against decline in cognitive functioning among breast cancer patients undergoing chemotherapy? Results from a small randomised controlled trial. *PLoS ONE* 2018;13(11):206874.
63. Hartman S, Nelson S, Myers E, Natarajan L, Sears D, Palmer B *et al.* Randomized controlled trial of increasing physical activity on objectively measured and self-reported cognitive functioning among breast cancer survivors: The Memory and Motion Study. *Cancer* 2018;124(1):192-202.
64. Hartman S, Nelson S, Marinac C, Natarajan L, Parker B, Patterson R. The effects of weight loss and metformin on cognition among breast cancer survivors: Evidence from the Reach for Health Study. *Psycho-Oncology* 2019; 28: 1640–1646.
65. Johnston M, Hays R, Subramanian S, Elashoff R, Axe E, Li J *et al.* Patient education integrated with acupuncture for relief of cancer-related fatigue randomized controlled feasibility study. *BMC Complement Altern Med* 2011;11:49.
66. Miki E, Kataoka T, Okamura H. Feasibility and efficacy of speed-feedback therapy with a bicycle ergometer on cognitive function in elderly cancer patients in Japan. *Psycho-Oncology* 2014; 23(8): 906-13.
67. Milbury K, Chaoul A, Biegler K, Wangyal T, Spelman A, Meyers C *et al.* Tibetan sound meditation for cognitive dysfunction: Results of a randomized controlled pilot trial. *Psycho-Oncology* 2013; 22(10): 2354-63.
68. Northey J, Pumpaa K, Quinlana C, Ikin A, Toohey K, Smeeb D *et al.* Cognition in breast cancer survivors: A pilot study of interval and continuous exercise. *J Sci Med Sport* 2019; 22: 580–585.

69. Oh B, Butow P, Mullan B, Clarke S, Beale P, Pavlakis N *et al.* Effect of medical Qigong on cognitive function, quality of life, and a biomarker of inflammation in cancer patients: a randomized controlled trial. *Support Care in Cancer* 2012; 20(6): 1235-42.
70. Pasyar N, Tashnizib N, Mansouria P, Tahmasebic S. Effect of yoga exercise on the quality of life and upper extremity volume among women with breast cancer related lymphedema: A pilot study. *Eur J Oncol Nurs* 2019;42:103–109.
71. Rahmani S, Talepasand S, Ghanbary-Motlagh A. Comparison of effectiveness the metacognition treatment and the mindfulness stress reduction on global and specific life quality of women with breast cancer. *Iran J Cancer Prev* 2014; 7(4): 184-96.
72. Reich R, Lengacher C, Alinat C, Kip K, Paterson C, Ramesar S *et al.* Mindfulness-based stress reduction in post-treatment breast cancer patients: Immediate and sustained effects across multiple symptom clusters. *J Pain Symptom Manage* 2017; 53(1): 85-95.
73. Rogers L, Hopkins-Price P, Vicari S, Pamenter R, Courneya K, Markwell S *et al.* A randomized trial to increase physical activity in breast cancer survivors. *Med Sci Sports Exerc* 2009; 41(4): 935–946.
74. Rottmann N, Dalton S, Bidstrup P, Wurtzen H, Hoybye M, Ross L *et al.* No improvement in distress and quality of life following psychosocial cancer rehabilitation. A randomised trial. *Psycho-Oncology* 2012; 21(5): 505-14.
75. Tong T, Pei C, Chen J, Lv Q, Zhang F, Cheng Z. Efficacy of acupuncture therapy for chemotherapy-related cognitive impairment in breast cancer patients. *Med Sci Monit* 2018; 24: 2919-2927.
76. Zimmer P, Baumann F, Oberste M, Wright P, Garthe A, Schenk A *et al.* Effects of exercise interventions and physical activity behaviour on cancer related cognitive impairments: A systematic review. *Biomed Res Int.* 2016; 1820954.
77. Breast cancer in Australia statistics. Cancer Australia; 2020 [Internet]. Available from: <https://www.canceraustralia.gov.au/affected-cancer/cancer-types/breast-cancer/statistics> [cited 2021, Sep 09].
78. Ganz P. Understanding the impact of breast cancer adjuvant endocrine therapy on cognitive function: a work in progress. *Br J Cancer* 2016; 114: 953–955.
79. Yang Y, Hendrix C. Cancer-related cognitive impairment in breast cancer patients: influences of psychological variables. *Asia Pac J Oncol Nurs* 2018; 5: 296–306.
80. Padgett L, Van Dyk K, Kelly N, Newman R, Hite S, Asher A. Addressing cancer-related cognitive impairment in cancer survivorship. *Oncol Issues* 2020; 35: 52-57.
81. Ferguson R, McDonald B, Saykin A, Ahles T. Brain structure and function differences in monozygotic twins: Possible effects of breast cancer chemotherapy. *J Clin Oncol* 25: 3866–3870.
82. Wefel J, Vardy J, Ahles T, Schagen S. International Cognition and Cancer Task Force recommendations to harmonise studies of cognitive function in patients with cancer. *Lancet Oncol* 2011; 12: 703–08.
83. Duncan M, Moschopoulou E, Herrington E, Deane J, Roylance R, Jones L *et al.* Review of systematic reviews of non-pharmacological interventions to improve quality of life in cancer survivors. *BMJ Open* 2017;7(11):15860
