# Supplementary material
Source: PubMed Central journal article supplement (PMC9980504)
Supplement: Supplementary_Digital_Material3.pdf [file Supplementary_Digital_Material3.pdf]

SUPPLEMENTARY DIGITAL MATERIAL 3

Supplementary Table III.—Quality of studies included in the review.

| Questions                                                       | Belle<br>ns <i>et</i><br><i>al.</i> ,<br>2020 | Bray <i>et</i><br><i>al.</i> , 2017 | Bjornkl<br>ett <i>et</i><br><i>al.</i> ,<br>2013 | Campb<br>ell <i>et</i><br><i>al.</i> ,<br>2018 | Caray<br>ol <i>et</i><br><i>al.</i> ,<br>2019 | Cherri<br>er <i>et</i><br><i>al.</i> ,<br>2013 | Damhol<br>dt <i>et al.</i> ,<br>2016 | Derry<br><i>et al.</i> ,<br>2015 | Din<br>g <i>et</i><br><i>al.</i> ,<br>2020 | Dos<br>Sant<br>os <i>et</i><br><i>al.</i> ,<br>2020 | Ercol<br>i <i>et</i><br><i>al.</i> ,<br>2015 | Fergus<br>on <i>et</i><br><i>al.</i> ,<br>2012 | Fergus<br>on <i>et</i><br><i>al.</i> ,<br>2016 | Freema<br>n <i>et al.</i> ,<br>2015 | Goedendo<br>rp <i>et al.</i> ,<br>2014 | Gokal<br><i>et al.</i> ,<br>2018 | Hartm<br>an <i>et</i><br><i>al.</i> ,<br>2018 | Hartma<br>n <i>et al.</i> ,<br>2019 | John<br>s <i>et</i><br><i>al.</i> ,<br>2016 | Johnst<br>on <i>et</i><br><i>al.</i> ,<br>2011 | Kesl<br>er <i>et</i><br><i>al.</i> ,<br>2013 | King<br>and<br>Gree<br>n,<br>2015 |
|-----------------------------------------------------------------|-----------------------------------------------|-------------------------------------|--------------------------------------------------|------------------------------------------------|-----------------------------------------------|------------------------------------------------|--------------------------------------|----------------------------------|--------------------------------------------|-----------------------------------------------------|----------------------------------------------|------------------------------------------------|------------------------------------------------|-------------------------------------|----------------------------------------|----------------------------------|-----------------------------------------------|-------------------------------------|---------------------------------------------|------------------------------------------------|----------------------------------------------|-----------------------------------|
| Was true randomisation used for assignment to treatment groups? | ✓                                             | ✓                                   | ✓                                                | ✓                                              | ✓                                             | ✓                                              | ✓                                    | ✓                                | ✓                                          | ✓                                                   | ✓                                            | ✓                                              | ✓                                              | ?                                   | ?                                      | ?                                | ✓                                             | ?                                   | ✓                                           | ✓                                              | ✓                                            | ✓                                 |
| Was allocation to treatment groups concealed?                   | ?                                             | ?                                   | ✓                                                | ?                                              | ✓                                             | X                                              | ?                                    | ?                                | ✓                                          | ✓                                                   | ✓                                            | X                                              | ?                                              | X                                   | ?                                      | ?                                | ✓                                             | ?                                   | ?                                           | ✓                                              | X                                            | ✓                                 |
| Were treatment groups similar at baseline?                      | ✓                                             | ✓                                   | ✓                                                | ✓                                              | ✓                                             | ✓                                              | ✓                                    | ✓                                | ✓                                          | ✓                                                   | ✓                                            | ✓                                              | ?                                              | ✓                                   | ✓                                      | ✓                                | ✓                                             | ?                                   | ✓                                           | ✓                                              | ✓                                            | ✓                                 |
| Were participants blind to treatment assignment?                | X                                             | X                                   | X                                                | X                                              | X                                             | X                                              | X                                    | X                                | X                                          | ✓                                                   | X                                            | X                                              | X                                              | ✓                                   | X                                      | X                                | X                                             | ?                                   | ✓                                           | X                                              | X                                            | X                                 |
| Were those delivering treatment blind to                        | X                                             | X                                   | ?                                                | X                                              | X                                             | X                                              | ?                                    | X                                | X                                          | X                                                   | X                                            | X                                              | X                                              | ✓                                   | X                                      | X                                | X                                             | X                                   | ?                                           | X                                              | X                                            | X                                 |



|                                                              |                          |                                |                              |                             |                           |                              |                            |                              |                         |                           |                             |                               |                              |                            |                             |                               |                              |                                |                           |                               |                             |                         |
|--------------------------------------------------------------|--------------------------|--------------------------------|------------------------------|-----------------------------|---------------------------|------------------------------|----------------------------|------------------------------|-------------------------|---------------------------|-----------------------------|-------------------------------|------------------------------|----------------------------|-----------------------------|-------------------------------|------------------------------|--------------------------------|---------------------------|-------------------------------|-----------------------------|-------------------------|
| which they were randomised ?                                 |                          |                                |                              |                             |                           |                              |                            |                              |                         |                           |                             |                               |                              |                            |                             |                               |                              |                                |                           |                               |                             |                         |
| Were outcomes measured in the same way for treatment groups? | ✓                        | ✓                              | ✓                            | ✓                           | ✓                         | ✓                            | ✓                          | ✓                            | ✓                       | ✓                         | ✓                           | ✓                             | ✓                            | ✓                          | ✓                           | ✓                             | ✓                            | ✓                              | ✓                         | ✓                             | ✓                           | ✓                       |
| Were outcomes measured in a reliable way?                    | ✓                        | ✓                              | ✓                            | ✓                           | ✓                         | ✓                            | ✓                          | ✓                            | ✓                       | ✓                         | ✓                           | ✓                             | ✓                            | ✓                          | ✓                           | ✓                             | ✓                            | ✓                              | ✓                         | ✓                             | ✓                           | ✓                       |
| Was appropriate statistical analysis used?                   | ✓                        | ✓                              | ✓                            | ✓                           | ✓                         | ✓                            | ✓                          | ✓                            | ✓                       | ✓                         | ✓                           | ✓                             | ✓                            | ✓                          | ✓                           | ✓                             | ✓                            | ✓                              | ✓                         | ✓                             | ✓                           | ✓                       |
| Was the trial design appropriate ?                           | ✓                        | ✓                              | ✓                            | ✓                           | ✓                         | ✓                            | ✓                          | ✓                            | ✓                       | ✓                         | ✓                           | ✓                             | ✓                            | ✓                          | ✓                           | ✓                             | ✓                            | ✓                              | ✓                         | ✓                             | ✓                           | ✓                       |
| TOTAL %                                                      | 69                       | 69                             | 85                           | 77                          | 77                        | 69                           | 69                         | 69                           | 77                      | 85                        | 77                          | 77                            | 62                           | 77                         | 62                          | 62                            | 77                           | 46                             | 85                        | 77                            | 69                          | 69                      |
|                                                              | May <i>et al.</i> , 2009 | McDougall <i>et al.</i> , 2011 | Meneses <i>et al.</i> , 2018 | Mihuta <i>et al.</i> , 2018 | Miki <i>et al.</i> , 2014 | Milbury <i>et al.</i> , 2013 | Myers <i>et al.</i> , 2019 | Northey <i>et al.</i> , 2019 | Oh <i>et al.</i> , 2012 | Park <i>et al.</i> , 2017 | Pasyar <i>et al.</i> , 2019 | Petersen <i>et al.</i> , 2018 | Rahmani <i>et al.</i> , 2014 | Reich <i>et al.</i> , 2017 | Rogers <i>et al.</i> , 2009 | Rottmann <i>et al.</i> , 2015 | Schmidt <i>et al.</i> , 2014 | Steindorf <i>et al.</i> , 2014 | Tong <i>et al.</i> , 2018 | Vadiraja <i>et al.</i> , 2009 | Von Ah <i>et al.</i> , 2014 | Wu <i>et al.</i> , 2018 |
| Was true randomisation used for                              | ?                        | ?                              | ?                            | ✓                           | ?                         | ?                            | ?                          | ✓                            | ✓                       | ?                         | X                           | ?                             | X                            | X                          | ?                           | X                             | ?                            | ?                              | ?                         | ✓                             | X                           | ?                       |

|                                                                 |   |   |   |   |   |   |   |   |   |   |   |   |   |   |   |   |   |   |   |   |   |   |
|-----------------------------------------------------------------|---|---|---|---|---|---|---|---|---|---|---|---|---|---|---|---|---|---|---|---|---|---|
| assignment to treatment groups?                                 |   |   |   |   |   |   |   |   |   |   |   |   |   |   |   |   |   |   |   |   |   |   |
| Was allocation to treatment groups concealed?                   | ? | X | ? | ✓ | X | ? | ? | ✓ | X | ? | ✓ | ? | ? | X | ? | X | ? | ? | ? | ? | X | ✓ |
| Were treatment groups similar at baseline?                      | ✓ | ? | ✓ | ✓ | ✓ | ✓ | ✓ | ✓ | ✓ | X | ✓ | ✓ | ✓ | ✓ | ✓ | ? | ✓ | ✓ | ✓ | ✓ | ✓ | ✓ |
| Were participants blind to treatment assignment ?               | X | ? | X | ? | X | ? | ? | ? | X | ✓ | X | ? | X | ✓ | ✓ | ✓ | ? | ? | ? | ✓ | ✓ | ✓ |
| Were those delivering treatment blind to treatment assignment ? | X | X | X | X | X | X | X | X | X | ✓ | X | X | ✓ | ✓ | ✓ | ✓ | X | X | X | ? | X | X |
| Were outcome assessors blind to treatment assignment ?          | X | ? | ? | ? | ✓ | ? | ? | ? | ? | ? | ✓ | ? | ? | ✓ | ? | ✓ | ? | ? | ✓ | ✓ | ✓ | ✓ |

|                                                                                             |   |   |   |   |   |   |   |   |   |   |   |   |   |   |   |   |   |   |   |   |   |   |   |
|---------------------------------------------------------------------------------------------|---|---|---|---|---|---|---|---|---|---|---|---|---|---|---|---|---|---|---|---|---|---|---|
| Were treatment groups treated identically other than the intervention of interest?          | ✓ | ? | ✓ | ✓ | ✓ | ✓ | ✓ | ✓ | ? | ✓ | ✓ | ? | ? | ✓ | ? | ? | ✓ | ✓ | ✓ | ✓ | ✓ | ? |   |
| Was follow up completed or differences between groups for follow up described and analysed? | ✓ | ✓ | ✓ | ✓ | ✓ | ✓ | ✓ | ✓ | ✓ | ✓ | ✓ | ✓ | ✓ | ✓ | ✓ | ✓ | ✓ | ✓ | ✓ | ✓ | ✓ | ✓ | ✓ |
| Were participants analysed in groups to which they were randomised ?                        | ✓ | ✓ | ✓ | ✓ | ✓ | ✓ | ✓ | ✓ | ✓ | ✓ | ✓ | ✓ | ✓ | ✓ | ✓ | ✓ | ✓ | ✓ | ✓ | ✓ | ✓ | ✓ | ✓ |
| Were outcomes measured in the same way for                                                  | ✓ | ✓ | ✓ | ✓ | ✓ | ✓ | ✓ | ✓ | ✓ | ✓ | ? | ✓ | ✓ | ✓ | ? | ? | ✓ | ✓ | ✓ | ✓ | ? | ? | ? |

|                                            |    |    |    |    |    |    |    |    |    |    |    |    |    |    |    |    |    |    |    |    |    |    |
|--------------------------------------------|----|----|----|----|----|----|----|----|----|----|----|----|----|----|----|----|----|----|----|----|----|----|
| treatment groups?                          |    |    |    |    |    |    |    |    |    |    |    |    |    |    |    |    |    |    |    |    |    |    |
| Were outcomes measured in a reliable way?  | ✓  | ✓  | ✓  | ✓  | ✓  | ✓  | ✓  | ✓  | ✓  | ✓  | ✓  | ✓  | ✓  | ✓  | ✓  | ✓  | ✓  | ✓  | ✓  | ✓  | ✓  | ✓  |
| Was appropriate statistical analysis used? | ✓  | ✓  | ✓  | ✓  | ✓  | ✓  | ✓  | ✓  | ✓  | ✓  | ✓  | ✓  | ✓  | ✓  | ✓  | ✓  | ✓  | ✓  | ✓  | ✓  | ✓  | ✓  |
| Was the trial design appropriate?          | ✓  | ?  | ✓  | ✓  | ✓  | ✓  | ✓  | ✓  | ✓  | ✓  | ✓  | ✓  | ✓  | ✓  | ✓  | ✓  | ✓  | ✓  | ✓  | ✓  | ✓  | ✓  |
| TOTAL %                                    | 62 | 39 | 62 | 77 | 69 | 62 | 54 | 77 | 62 | 75 | 69 | 54 | 62 | 89 | 54 | 65 | 62 | 62 | 65 | 85 | 62 | 69 |

✓ Evidence of this feature found in the written article; ?: insufficient evidence provided in the written article; X: no evidence provided in the written article.

## References

1. Myers J. Chemotherapy-related cognitive impairment: The breast cancer experience. *Oncol Nurs Forum* 2012; 39(1):31-40.
2. Janelsins M, Kesler S, Ahles T, Morrow G. Prevalence, mechanisms, and management of cancer-related cognitive impairment. *Int Rev Psychiatry* 2014; 26(1): 102–113.
3. Kanaskie M. Chemotherapy-related cognitive change: A principle-based concept analysis. *Oncol Nurs Forum* 2012; 39(3): 241-248.
4. Pergolotti M, Williams G, Campbell C, Munoz L, Muss H. Occupational therapy for adults with cancer: Why it matters. *Oncologist* 2016; 21: 314-9.
5. Nott M, Barden H, Chapparo C, Ranka J. Evidence based practice and knowledge translation: A survey of Australian occupational therapy practice with clients experiencing neurocognitive impairments. *Aust Occup Ther J* 2020; 67: 74-82.
6. Wallis A, Meredith P, Stanley M. Cancer care and occupational therapy: A scoping review. *Aust Occup Ther J* 2020; 67: 172–194.
7. Faithfull S, Samuel C, Lemanska A, Warnock C, Greenfield D. Self-reported competence in long term care provision for adult cancer survivors: A cross sectional survey of nursing and allied health care professionals. *Int J Nurs Stud* 2016; 53: 85-94.
8. Mulcahy S, Prendergast J, Foley G, Hare A, Murphy E, Guinan E *et al.* Exercise rehabilitation services provided by physiotherapy departments in cancer care in Ireland. *Ir Med J* 2018; 111(9): 817-818.
9. Ranka J, Chapparo C. Definition of terms. In J. Ranka, C Chapparo. *Occupational Performance Model (Australia): Monograph 1.* Sydney: Occupational Performance Network; 1997. p.58–60.
10. Boykoff N, Moieni M, Subramanian S. Confronting chemobrain: An in-depth look at survivors’ reports of impact on work, social networks, and health care response. *J Cancer Surviv* 2009; 3(4): 223-232.
11. Calvio L, Peugeot M, Bruns G, Todd B, Feuerstein M. Measures of cognitive function and work in occupationally active breast cancer survivors. *J Occup Environ Med* 2010; 52(2): 219-227.
12. Selamat M, Loh S, Mackenzie L, Vardy J. Chemobrain experienced by breast cancer survivors: A meta-ethnography study investigating research and care implications. *PLoS One* 2014;9(9):108002.
13. Simons D, Boot W, Charness N, Gathercole S, Chabris C, Hambrick D, *et al.* Do “brain-training” programs work? *Psychol Sci Public Interest* 2016;17:103–186.
14. Sala G, Gobet F. Cognitive training does not enhance general cognition. *Trends Cogn Sci* 2019;23:9-20.
15. Lange M, Joly F, Vardy J, Ahles T, Dubois M, Tron L *et al.* Cancer-related cognitive impairment: an update on state of the art, detection, and management strategies in cancer survivors. *Ann Oncol* 2019; 30: 1925–1940.
16. Treanor CJ, McMenamin UC, O'Neill RF, Cardwell CR, Clarke MJ, Cantwell M, Donnelly M. Non-pharmacological interventions for cognitive impairment due to systemic cancer treatment. *Cochrane Database Syst Rev.* 2016;(8):CD011325.
17. Zeng Y, Dong J, Huang M, Zhang J, Zhang X, Xie M *et al.* Nonpharmacological interventions for cancer-related cognitive impairment in adult cancer patients: A network meta-analysis. *Int J Nurs Stud* 2020;104:103514.
18. Ehlers D, Aquinaga S, Cosman J, Severson J, Kramer A, McAuley E. The effects of physical activity and fatigue on cognitive performance in breast cancer survivors. *Breast Cancer Res Treat* 2017;165(3):699-707.
19. Myers J. Review complementary and integrative interventions for cancer-related cognitive changes. *Asia Pac J Oncol Nurs* 2015;2:215-26.
20. Barton D, Burger K, Novotany P, Fitch T, Kohli S, Soori G, *et al.* The use of Ginkgo biloba for the prevention of chemotherapy-related cognitive dysfunction in women receiving adjuvant treatment for breast cancer. *Support Care Cancer* 2013; 21(4): 1185-92.
21. Von Ah D, Jansen C, Allen D. Evidence-based interventions for cancer and treatment-related cognitive impairment. *Clin J Oncol Nurs* 2014; 18(6): 17-25.
22. Nathan P, Sunita K, Dilley K. Guidelines for identification of, advocacy for, and intervention in neurocognitive problems in survivors of childhood cancer. *Arch Pediatr Adolesc Med* 2007; 161(8): 798-806.
23. Taphoom M, Klein M. Cognitive deficits in adult patients with brain tumours. *Lancet Neurol* 2004; 3(3): 159-68.
24. Higgins J, Green S. *Cochrane Handbook for Systematic Reviews of Interventions Version 5.1.0.* London: The Cochrane Collaboration; 2011.
25. Checklist for randomized controlled trials. Joanna Briggs Institute; 2017 [Internet]. Available from: [https://joannabriggs.org/sites/default/files/2019-05/JBI\\_RCTs\\_Appraisal\\_tool2017\\_0.pdf](https://joannabriggs.org/sites/default/files/2019-05/JBI_RCTs_Appraisal_tool2017_0.pdf) [cited 2021, Sep 09].
26. Borenstein M, Hedges L, Higgins J, Rothstein H. *Introduction to meta-analysis.* Hoboken, NJ: Wiley-Blackwell; 2009.
27. Dos Santos M, Hardy-Léger I, Rigal O, Licaj I, Dauchy S, Levy C, *et al.* Cognitive rehabilitation program to improve cognition of cancer patients treated with chemotherapy: A 3-arm randomized trial. *Cancer* 2020;

126: 5328-5336.

28. Freeman L, White R, Ratcliff C, Sutton S, Stewart M, Palmer J, *et al.* A randomized trial comparing live and telemedicine deliveries of an imagery-based behavioral intervention for breast cancer survivors: reducing symptoms and barriers to care. *Psycho-Oncology* 2015; 24(8): 910-8.
29. Von Ah D, Carpenter J, Saykin A, Monahan P, Wu J, Yu M, *et al.* Advanced cognitive training for breast cancer survivors: A randomized controlled trial. *Breast Cancer Res Treat* 2012; 135: 799–809.
30. Peterson B, Johnson C, Case K, Shackelford D, Brown J, Lalonde T, *et al.* Feasibility of a combined aerobic and cognitive training intervention on cognitive function in cancer survivors: A pilot investigation. *Pilot Feasibility Stud* 2018; 4:50.
31. Ferguson R, Sigmon S, Pritchard A, LaBrie S, Goetze R, Fink C, *et al.* A randomized trial of videoconference-delivered cognitive behavioral therapy for survivors of breast cancer with self-reported cognitive dysfunction. *Cancer* 2016; 122(11):1782-91.
32. Johns S, Von Ah D, Brown L, Beck-Coon K, Talib T, Alyea J, *et al.* Randomized controlled pilot trial of mindfulness-based stress reduction for breast and colorectal cancer survivors: effects on cancer-related cognitive impairment. *J Cancer Surviv* 2016; 10(3): 437-48.
33. Larke L, Roe D, Smith L, Millstine D. Exploratory outcome assessment of Qigong/Tai Chi Easy on breast cancer survivors. *Complement Ther Med* 2016; 29: 196-203.
34. May A, Korstjens I, van Weert E, van den Borne B, Hoekstra-Weebers J, van der Schans C, *et al.* Long-term effects on cancer survivors' quality of life of physical training *versus* physical training combined with cognitive-behavioral therapy: results from a randomized trial. *Support Care Cancer* 2009; 17(6): 653-63.
35. McDougall G, Becker H, Acee T, Vaughan P, Delville C. Symptom management of affective and cognitive disturbance with a group of cancer survivors. *Arch Psychiatr Nurs* 2011; 25(1): 24–35.
36. Myers J, Mitchell M, Krigel S, Steinhoff A, Boyce-White A, Van Goethem, K, *et al.* Qigong intervention for breast cancer survivors with complaints of decreased cognitive function. *Support Care Cancer* 2019; 27:1395–1403.
37. Schmidt M, Wiskemann J, Armbrust P, Schneeweiss A, Ulrich C, Steindorf, K. Effects of resistance exercise on fatigue and quality of life in breast cancer patients undergoing adjuvant chemotherapy: A randomized controlled trial. *Int J Cancer* 2015; 137: 471–480.
38. Steindorf K, Schmidt M, Klassen O, Ulrich C, Oelmann J, Habermann N, *et al.* Randomized, controlled trial of resistance training in breast cancer patients receiving adjuvant radiotherapy: Results on cancer-related fatigue and quality of life. *Ann Oncol* 2014; 25: 2237–2243.
39. Vadiraja H, Rao M, Negendra H, Rekha M, Vanitha N, Gopinath K *et al.* Effects of yoga program on quality of life and affect in early breast cancer patients undergoing adjuvant radiotherapy: A randomized controlled trial. *Complement Ther Med* 2009; 17(5): 274-80.
40. Functional assessment of cancer therapy-cognition FACT-Cog. FACIT; 2016 [Internet]. Available from: <https://www.facit.org/measures/FACT-Cog> [cited 2021, Sep 09].
41. European Organization for Research and Treatment of Cancer Quality of life questionnaire EORTC-QLQ-C30. EORTC; 1995 [Internet]. Available from: [https://www.eortc.org/research\\_field/quality-of-life/](https://www.eortc.org/research_field/quality-of-life/) [cited 2021, Sep 09].
42. WISC-IV Clinical Use and Interpretation. Wechsler Adult Intelligence Scale; 2008 [Internet]. Available from: <https://www.sciencedirect.com/topics/neuroscience/wechsler-adult-intelligence-scale> [cited 2021, Sep 09].
43. Controlled Oral Word Association Test. *Encyclopedia of Clinical Neuropsychology*; 2011 [Internet]. Available from: [https://link.springer.com/referenceworkentry/10.1007%2F978-0-387-79948-3\\_876](https://link.springer.com/referenceworkentry/10.1007%2F978-0-387-79948-3_876) [cited 2021, Sep 09].
44. Bellens A, Roelant E, Sabbe B, Peeters M, van Dam P. A video game based cognitive training for breast cancer survivors with cognitive impairment: A prospective randomized pilot trial. *The Breast* 2020; 53: 23-32.
45. Bray V, Dhillon H, Bell H, Kabourakis M, Fiero M, Yip D *et al.* Evaluation of a web-based cognitive rehabilitation program in cancer survivors reporting cognitive symptoms after chemotherapy. *J Clin Oncol* 2017; 35: 217-225.
46. Cherrier M, Anderson K, David D, Higano C, Gray H, Church A *et al.* A randomized trial of cognitive rehabilitation in cancer survivors. *Life Sci* 2013; 93(17): 617-22.
47. Damholdt M, Mehlsen M, O'Toole M, Andreasen R, Pedersen A, Zachariae R. Web-based cognitive training for breast cancer survivors with cognitive complaints—a randomized controlled trial. *Psycho-Oncology* 2016; 25:1293–1300.



48. Ercoli L, Petersen L, Hunter A, Castellon S, Kwan L, Kahn-Mills B *et al.* Cognitive rehabilitation group intervention for breast cancer survivors: results of a randomized clinical trial. *Psycho-Oncology* 2015; 24(11): 1360-7.
49. Kesler S, Hosseini H, Heckler C, Janelins M, Paresh O, Mustian K *et al.* Cognitive training for improving executive function in chemotherapy-treated breast cancer survivors. *Clin Breast Cancer* 2013; 13(4): 299-306.
50. King S, Green H. Psychological intervention for improving cognitive function in cancer survivors: A literature review and randomized controlled trial. *Front Oncol* 2015; 5: 72.
51. Meneses K, Benz R, Bail J, Vo J, Triebel K, Fazeli P *et al.* Speed of processing training in middle-aged and older breast cancer survivors (SOAR): Results of a randomized controlled pilot. *Breast Cancer Res Treat* 2018; 168: 259–267.
52. Mihuta M, Green H, Shum D. Web-based cognitive rehabilitation for survivors of adult cancer: A randomised controlled trial. *Psycho-Oncology* 2018; 27: 1172–1179.
53. Park J, Jung Y, Kim K, Bae S. Effects of compensatory cognitive training intervention for breast cancer patients undergoing chemotherapy: A pilot study. *Support Care in Cancer* 2017; 25: 1887–1896.
54. Wu L, Amidi A, Tanenbaum M, Winkel G, Gordon W, Hall S *et al.* Computerized cognitive training in prostate cancer patients on androgen deprivation therapy: A pilot study. *Support Care in Cancer* 2018; 26: 1917–1926.
55. Ferguson R, McDonald B, Rocque M, Furstenberg C, Horrigan S, Ahles T *et al.* Development of CBT for chemotherapy-related cognitive change: results of a waitlist control trial. *Psycho-Oncology* 2012; 21(2):176-86.
56. Goedendorp M, Knoop H, Gielissen M, Verhagen C, Bleijenberg G. The effects of cognitive behavioral therapy for post-cancer fatigue on perceived cognitive disabilities and neuropsychological test performance. *J Pain Symptom Manage* 2014; 47(1): 35-44.
57. Bjorneklett H, Rosenblad A, Lindernalm C, Ojutkangas M, Letocha H, Strang P *et al.* Long-term follow up of a randomized study of support group intervention in women with primary breast cancer. *J Psychosom Res* 2013; 74(4): 346-53.
58. Campbell K, Kam J, Neil-Sztramko S, Ambrose T, Handy T, Lim, H *et al.* Effect of aerobic exercise on cancer-associated cognitive impairment: A proof-of-concept RCT. *Psycho-Oncology* 2018; 27: 53–60.
59. Carayol M, Ninot G, Senesse P, Bleuse J, Gourgou S, Sancho-Garnier H *et al.* Short- and long-term impact of adapted physical activity and diet counseling during adjuvant breast cancer therapy: The “APAD1” randomized controlled trial. *BMC Cancer* 2019; 19:737.
60. Derry H, Jaremka L, Bennett J, Peng J, Andridge R, Shapiro C *et al.* Yoga and self-reported cognitive problems in breast cancer survivors: a randomized controlled trial. *Psycho-Oncology* 2015; 24(8): 958-66.
61. Ding K, Zhang X, Zhao J, Zuo H, Bi Z, Cheng H. Managing Cancer and Living Meaningfully (CALM) intervention on chemotherapy-related cognitive impairment in breast cancer survivors. *Integr Cancer Ther* 2020; 19: 1–10.
62. Gokal K, Munir F, Ahmed S, Kancherla K, Wallis D. Does walking protect against decline in cognitive functioning among breast cancer patients undergoing chemotherapy? Results from a small randomised controlled trial. *PLoS ONE* 2018;13(11):206874.
63. Hartman S, Nelson S, Myers E, Natarajan L, Sears D, Palmer B *et al.* Randomized controlled trial of increasing physical activity on objectively measured and self-reported cognitive functioning among breast cancer survivors: The Memory and Motion Study. *Cancer* 2018;124(1):192-202.
64. Hartman S, Nelson S, Marinac C, Natarajan L, Parker B, Patterson R. The effects of weight loss and metformin on cognition among breast cancer survivors: Evidence from the Reach for Health Study. *Psycho-Oncology* 2019; 28: 1640–1646.
65. Johnston M, Hays R, Subramanian S, Elashoff R, Axe E, Li J *et al.* Patient education integrated with acupuncture for relief of cancer-related fatigue randomized controlled feasibility study. *BMC Complement Altern Med* 2011;11:49.
66. Miki E, Kataoka T, Okamura H. Feasibility and efficacy of speed-feedback therapy with a bicycle ergometer on cognitive function in elderly cancer patients in Japan. *Psycho-Oncology* 2014; 23(8): 906-13.
67. Milbury K, Chaoul A, Biegler K, Wangyal T, Spelman A, Meyers C *et al.* Tibetan sound meditation for cognitive dysfunction: Results of a randomized controlled pilot trial. *Psycho-Oncology* 2013; 22(10): 2354-63.
68. Northey J, Pumpaa K, Quinlana C, Ikin A, Toohey K, Smeeb D *et al.* Cognition in breast cancer survivors: A pilot study of interval and continuous exercise. *J Sci Med Sport* 2019; 22: 580–585.

69. Oh B, Butow P, Mullan B, Clarke S, Beale P, Pavlakis N *et al.* Effect of medical Qigong on cognitive function, quality of life, and a biomarker of inflammation in cancer patients: a randomized controlled trial. *Support Care in Cancer* 2012; 20(6): 1235-42.
70. Pasyar N, Tashnizib N, Mansouria P, Tahmasebic S. Effect of yoga exercise on the quality of life and upper extremity volume among women with breast cancer related lymphedema: A pilot study. *Eur J Oncol Nurs* 2019;42:103–109.
71. Rahmani S, Talepasand S, Ghanbary-Motlagh A. Comparison of effectiveness the metacognition treatment and the mindfulness stress reduction on global and specific life quality of women with breast cancer. *Iran J Cancer Prev* 2014; 7(4): 184-96.
72. Reich R, Lengacher C, Alinat C, Kip K, Paterson C, Ramesar S *et al.* Mindfulness-based stress reduction in post-treatment breast cancer patients: Immediate and sustained effects across multiple symptom clusters. *J Pain Symptom Manage* 2017; 53(1): 85-95.
73. Rogers L, Hopkins-Price P, Vicari S, Pamentor R, Courneya K, Markwell S *et al.* A randomized trial to increase physical activity in breast cancer survivors. *Med Sci Sports Exerc* 2009; 41(4): 935–946.
74. Rottmann N, Dalton S, Bidstrup P, Wurtzen H, Hoybye M, Ross L *et al.* No improvement in distress and quality of life following psychosocial cancer rehabilitation. A randomised trial. *Psycho-Oncology* 2012; 21(5): 505-14.
75. Tong T, Pei C, Chen J, Lv Q, Zhang F, Cheng Z. Efficacy of acupuncture therapy for chemotherapy-related cognitive impairment in breast cancer patients. *Med Sci Monit* 2018; 24: 2919-2927.
76. Zimmer P, Baumann F, Oberste M, Wright P, Garthe A, Schenk A *et al.* Effects of exercise interventions and physical activity behaviour on cancer related cognitive impairments: A systematic review. *Biomed Res Int.* 2016; 1820954.
77. Breast cancer in Australia statistics. Cancer Australia; 2020 [Internet]. Available from: <https://www.canceraustralia.gov.au/affected-cancer/cancer-types/breast-cancer/statistics> [cited 2021, Sep 09].
78. Ganz P. Understanding the impact of breast cancer adjuvant endocrine therapy on cognitive function: a work in progress. *Br J Cancer* 2016; 114: 953–955.
79. Yang Y, Hendrix C. Cancer-related cognitive impairment in breast cancer patients: influences of psychological variables. *Asia Pac J Oncol Nurs* 2018; 5: 296–306.
80. Padgett L, Van Dyk K, Kelly N, Newman R, Hite S, Asher A. Addressing cancer-related cognitive impairment in cancer survivorship. *Oncol Issues* 2020; 35: 52-57.
81. Ferguson R, McDonald B, Saykin A, Ahles T. Brain structure and function differences in monozygotic twins: Possible effects of breast cancer chemotherapy. *J Clin Oncol* 25: 3866–3870.
82. Wefel J, Vardy J, Ahles T, Schagen S. International Cognition and Cancer Task Force recommendations to harmonise studies of cognitive function in patients with cancer. *Lancet Oncol* 2011; 12: 703–08.
83. Duncan M, Moschopoulou E, Herrington E, Deane J, Roylance R, Jones L *et al.* Review of systematic reviews of non-pharmacological interventions to improve quality of life in cancer survivors. *BMJ Open* 2017;7(11):15860
